# Supplementary material
Source: publisher site journal article supplement (https://www.degruyterbrill.com/publication/journal_key/JMC/downloadAsset/JMC_JMC_Special%20Issue%20proposal%20form.docx)
Supplement: Supplementary file 1 [file JMC_JMC_Special%20Issue%20proposal%20form.docx]

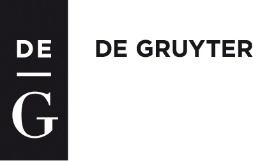


[Journal of Mathematical Cryptology](https://www.degruyter.com/journal/key/jmc/html)

Special Issue proposal

Please fill out the form below and let us know what your special issue will be about.

| Special Issue title | |  | |
| --- | --- | --- | --- |
| Section/category | |  | |
| Description | |  | |
| Topics | |  | |
| Estimated number of papers | |  | |
| Suggested deadline for submissions | |  | |
| Guest editorial team: | | | |
| GE | Name | |  |
| Email | |  |
| Affiliation | |  |
| Job title | |  |
| Region/country | |  |
| Co-GE | Name | |  |
| Email | |  |
| Affiliation | |  |
| Job title | |  |
| Region/country | |  |
| Co-GE | Name | |  |
| Email | |  |
| Affiliation | |  |
| Job title | |  |
| Region/country | |  |

Feel free to add other important information to your proposal.

Remember that the guest editors are essential for your work as they should provide expert knowledge on the topic of your Special Issue and must willingly contribute their time throughout the process.

Please, send the completed form to Editorial Office – [jmc_editorial@degruyter.com](mailto:jmc_editorial@degruyter.com)
